# Supplementary material
Source: PubMed Central journal article supplement (PMC3650529)
Supplement: JB.00116-13_zjb999092595so1.pdf [file JB.00116-13_zjb999092595so1.pdf]

# Supplemental Material

## *myo*-inositol and D-ribose ligand discrimination in an ABC periplasmic binding protein

Julien Herrou<sup>1</sup> and Sean Crosson<sup>1, 2, #</sup>

<sup>1</sup> Department of Biochemistry and Molecular Biology, University of Chicago, Chicago, IL, USA.

<sup>2</sup> The Committee on Microbiology, University of Chicago, Chicago, IL, USA.

# Corresponding Author:

Department of Biochemistry and Molecular Biology  
University of Chicago  
929 East 57th Street  
GCIS W138  
Chicago, IL 60637  
Phone: (773) 834-1926  
Fax: (773) 702-0439  
Email: [scrosson@uchicago.edu](mailto:scrosson@uchicago.edu)

Running title : Structure of *Caulobacter myo*-inositol binding protein.

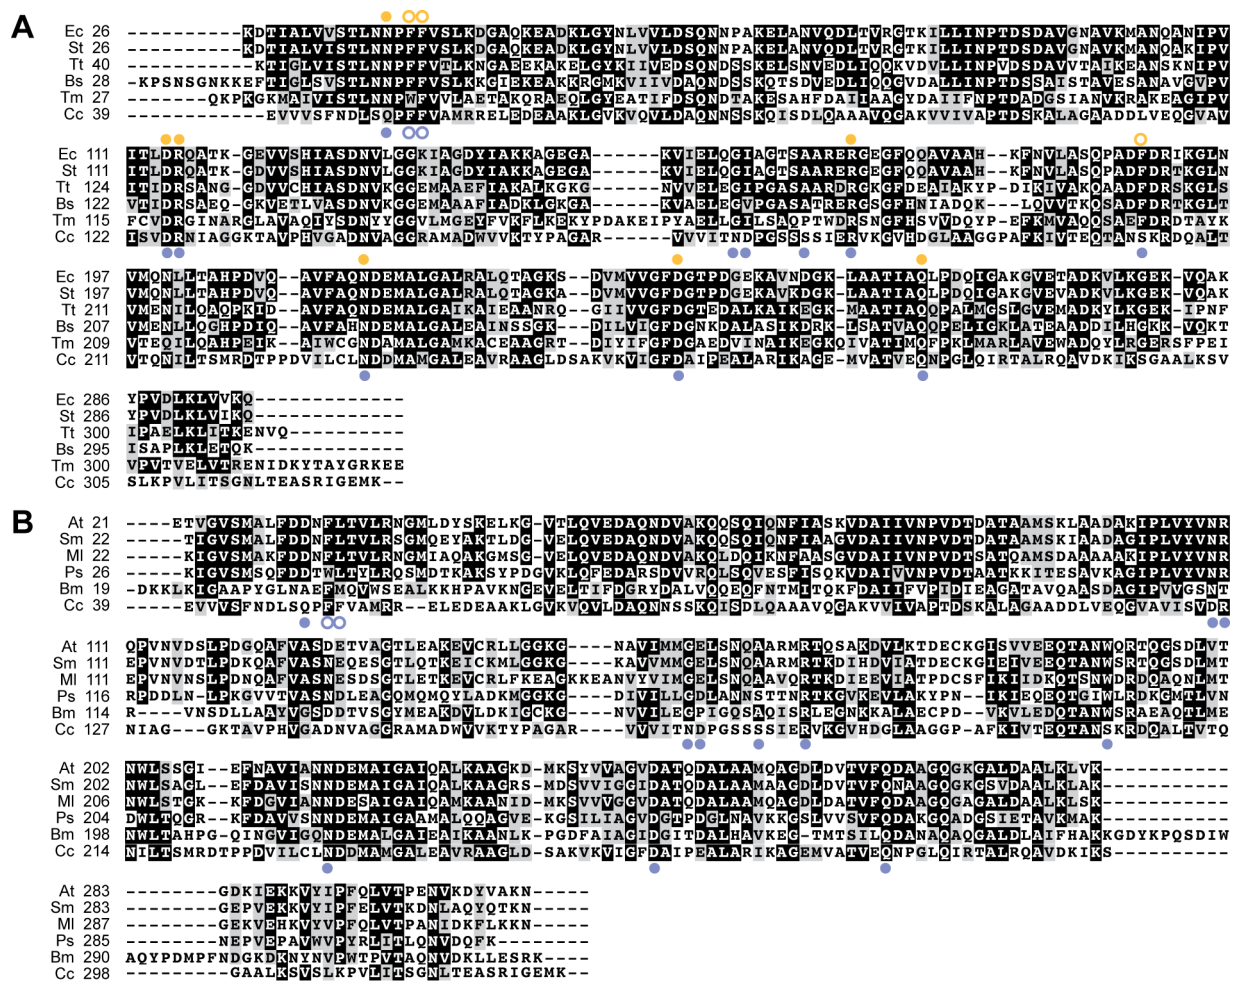

**FIG S1** Amino acid sequence alignment of *C. crescentus* IbpA and RBP and IBP proteins. Solid circles highlight residues involved in polar interactions; open circles highlight residues that make hydrophobic interactions between IbpA and *myo*-inositol (in blue) and between RBPs and ribose (in orange). (A) Amino acid sequence alignment of the IbpA and RBP proteins. Sequences from from *Escherichia coli* (Ec), *Salmonella typhimurium* (St), *Thermoanaerobacter tengcongensis* (Tt), *Bacillus subtilis* (Bs), *Thermotoga maritima* (Tm) and *Caulobacter crescentus* (Cc) are included in this alignment. (B) Sequence alignment of IbpA and other IBP proteins. Sequences from *Agrobacterium tumefaciens* (At), *Sinorhizobium meliloti* (Sm), *Mesorhizobium loti* (MI), *Pseudomonas sp. GM48* (Ps), *Brucella melitensis* (Bm) and *Caulobacter crescentus* (Cc) are included in this alignment.

**Table S1 : primers.**

| Primer                   | Sequence                                  | Comment                                                                                                                                     |
|--------------------------|-------------------------------------------|---------------------------------------------------------------------------------------------------------------------------------------------|
| IbpA1-UP                 | 5'- <b>CATATG</b> GAGGTGGTGGTCAGCTTC-3'   | Primers used to amplify <i>IbpA</i> without the sequence coding the peptide signal. Corresponding insert cloned into pET28c (NdeI-HindIII). |
| IbpA1-LO                 | 5'- <b>AAGCTT</b> CTATTTTCATCTCGCCGAT-3'  |                                                                                                                                             |
| IbpA2-UP                 | 5'- <b>AAGCTT</b> AGAACACGACCACGCCCTTG-3' | Primers used to amplify <i>IbpA</i> with 500 bp flanking regions. Corresponding insert cloned into pNPTS138 (HindIII-SphI).                 |
| IbpA2-LO                 | 5'- <b>GCATGC</b> GCGCGTTCAGGGTCATGG-3'   |                                                                                                                                             |
| Q49>N49-UP               | 5'-GACCTTTCCAACCCCTTCTTC-3'               | Primers used to substitute Q49 by Asn                                                                                                       |
| Q49>N49-LO               | 5'-GAAGAAGGGGTTGGAAAGGTC-3'               |                                                                                                                                             |
| N168>G168-UP             | 5'-GTCATCACCGGCATCCCGGG-3'                | Primers used to substitute N168 by Gly                                                                                                      |
| N168>G168-LO             | 5'-CCCGGGATGCCGGTGATGAC-3'                |                                                                                                                                             |
| D169>I169 / S174>A174-UP | 5'-ATCCCGGGCAGCTCCGCC-3'                  | Primers used to substitute D169 by Ile and S174 by Ala                                                                                      |
| D169>I169 / S174>A174-LO | 5'-GGCGGAGCTGCCCGGGAT-3'                  |                                                                                                                                             |
| S203>F203-UP             | 5'-CCGCCAACTTCAAGCGCGA-3'                 | Primers used to substitute S203 by Phe                                                                                                      |
| S203>F203-LO             | 5'-TCGCGCTTGAAGTTGGCGG-3'                 |                                                                                                                                             |

**Table S2 : Strains.**

| Strain number | Organism                  | Plasmid  | Restriction sites | Genes                                                                                                                                        | Comments                                                                | References              |
|---------------|---------------------------|----------|-------------------|----------------------------------------------------------------------------------------------------------------------------------------------|-------------------------------------------------------------------------|-------------------------|
| FC20          | <i>CB15N</i>              |          |                   |                                                                                                                                              | CCWT, wild type strain                                                  |                         |
| FC405         | <i>CB15N</i>              |          |                   | <i>iatP</i> (CC0861) – deleted for <i>iatP</i> (permease).                                                                                   | CC $\Delta$ <i>iatP</i> mutant strain                                   | Boutte C. <i>et al.</i> |
| FC488         | <i>CB15N</i>              |          |                   | <i>lbpA</i> (CC0859) – deleted for <i>lbpA</i> (periplasmic binding protein).                                                                | CC $\Delta$ <i>lbpA</i> mutant strain                                   | Boutte C. <i>et al.</i> |
| FC489         | <i>CB15N</i>              |          |                   | <i>iatA</i> (CC0860) – deleted for <i>iatA</i> (ATP binding cassette).                                                                       | CC $\Delta$ <i>iatA</i> mutant strain                                   | Boutte C. <i>et al.</i> |
| FC1898        | <i>E. coli</i> Top10      | pET28c   | Ndel - HindIII    | <i>lbpA</i> (CC0859)                                                                                                                         | Strain carrying the expression vector pET28c- <i>lbpA</i>               | This study              |
| FC1899        | <i>Rosetta</i> (DE3)pLysS | pET28c   | Ndel - HindIII    | <i>lbpA</i> (CC0859)                                                                                                                         | Strain used to overexpress the His tagged version of the wild-type MIBP | This study              |
| FC1900        | <i>E. coli</i> Top10      | pET28c   | Ndel - HindIII    | <i>lbpA</i> (CC0859) – mutations have been introduced in the ligand binding pocket (Q49>N49, D169>I169, S174>A174 and S203>F203).            | Strain carrying the expression vector pET28c- <i>lbpACM1</i>            | This study              |
| FC1901        | <i>Rosetta</i> (DE3)pLysS | pET28c   | Ndel - HindIII    | <i>lbpA</i> (CC0859) – mutations have been introduced in the ligand binding pocket (Q49>N49, D169>I169, S174>A174 and S203>F203).            | Strain used to overexpress the His tagged version of the <i>lbpACM1</i> | This study              |
| FC1902        | <i>E. coli</i> Top10      | pET28c   | Ndel - HindIII    | <i>lbpA</i> (CC0859) – mutations have been introduced in the ligand binding pocket (Q49>N49, N168>G168, D169>I169, S174>A174 and S203>F203). | Strain carrying the expression vector pET28c- <i>lbpACM2</i>            | This study              |
| FC1903        | <i>Rosetta</i> (DE3)pLysS | pET28c   | Ndel - HindIII    | <i>lbpA</i> (CC0859) – mutations have been introduced in the ligand binding pocket (Q49>N49, N168>G168, D169>I169, S174>A174 and S203>F203). | Strain used to overexpress the His tagged version of the <i>lbpACM2</i> | This study              |
| FC1904        | <i>E. coli</i> Top10      | pNPTS138 | HindIII - SphI    | <i>lbpA</i> (CC0859) – mutations have been introduced in the ligand binding pocket (Q49>N49, D169>I169, S174>A174 and S203>F203).            | Strain used for allelic replacement of <i>lbpA</i> by <i>lbpACM1</i>    | This study              |
| FC1905        | <i>CB15N</i>              |          |                   | <i>lbpA</i> (CC0859) – mutations have been introduced in the ligand binding pocket (Q49>N49, N168>G168, D169>I169 and S174>A174).            | <i>lbpACM1</i> mutant strain                                            | This study              |
| FC1906        | <i>E. coli</i> Top10      | pNPTS138 | HindIII - SphI    | <i>lbpA</i> (CC0859) – mutations have been introduced in the ligand binding pocket (Q49>N49, N168>G168, D169>I169, S174>A174 and S203>F203). | Strain used for allelic replacement of <i>lbpA</i> by <i>lbpACM2</i>    | This study              |
| FC1907        | <i>CB15N</i>              |          |                   | <i>lbpA</i> (CC0859) – mutations have been introduced in the ligand binding pocket (Q49>N49, N168>G168, D169>I169, S174>A174 and S203>F203). | <i>lbpACM2</i> mutant strain                                            | This study              |
